# Supplementary material for: Sulfur-containing spiroketals from Breynia disticha and evaluations of their anti-inflammatory effect
Source: Beilstein J Org Chem. 2023 Oct 19;19:1604–14. doi: 10.3762/bjoc.19.117 (PMC10616701; doi:10.3762/bjoc.19.117)
Supplement: File 2 — Calculated energies and cartesian coordinates for the optimized conformers for 1′, 2′, and 3. [file Beilstein_J_Org_Chem-19-1604-s002.xlsx]

## Sheet: Compound 1
Table S1 Calculated energies and cartesian coordinates for the optimized conformers for 1′
Compound 1′
conformer 1				conformer 2				conformer 3				conformer 4				conformer 5				conformer 6				conformer 7				conformer 8				conformer 9
Energy (Hartree)				Energy (Hartree)				Energy (Hartree)				Energy (Hartree)				Energy (Hartree)				Energy (Hartree)				Energy (Hartree)				Energy (Hartree)				Energy (Hartree)
-2274.43				-2274.43				-2274.43				-2274.43				-2274.43				-2274.43				-2274.43				-2274.43				-2274.42
atom	X axis (Å)	Y axis (Å)	Z axis (Å)	atom	X axis (Å)	Y axis (Å)	Z axis (Å)	atom	X axis (Å)	Y axis (Å)	Z axis (Å)	atom	X axis (Å)	Y axis (Å)	Z axis (Å)	atom	X axis (Å)	Y axis (Å)	Z axis (Å)	atom	X axis (Å)	Y axis (Å)	Z axis (Å)	atom	X axis (Å)	Y axis (Å)	Z axis (Å)	atom	X axis (Å)	Y axis (Å)	Z axis (Å)	atom	X axis (Å)	Y axis (Å)	Z axis (Å)
C	0.93821	3.88664	0.85787	C	1.4337	4.86286	-0.71	C	1.30542	2.34773	0.84114	C	1.53186	3.34615	1.72034	C	0.91848	3.58239	1.23076	C	2.55092	3.46445	0.0125	C	1.09954	3.15206	1.84112	C	0.56534	3.97376	0.74379	C	2.20174	3.23052	-1.01323
C	1.46605	4.7682	-0.09437	C	1.83606	4.54854	0.59534	C	2.13077	3.1194	0.00936	C	2.51926	4.07142	1.04077	C	1.62641	4.46183	0.40188	C	3.40628	4.49154	0.43155	C	2.04665	3.98152	1.22788	C	0.95177	4.89549	-0.23822	C	2.03009	4.08882	0.08606
C	0.77781	5.0111	-1.29083	C	1.05274	3.70323	1.392	C	1.56159	3.99221	-0.93177	C	2.30663	4.48853	-0.2805	C	1.10719	4.82995	-0.84679	C	4.72768	4.2107	0.80913	C	1.81373	4.49419	-0.05562	C	0.16427	5.08059	-1.38299	C	2.8922	3.98802	1.18909
C	-0.43306	4.37208	-1.52573	C	-0.13467	3.18026	0.88562	C	0.18135	4.02844	-1.09093	C	1.10833	4.17881	-0.91191	C	-0.11601	4.31492	-1.25809	C	5.18723	2.8996	0.77261	C	0.63702	4.16883	-0.71948	C	-1.00255	4.34344	-1.53777	C	3.81008	2.94406	1.25042
C	-0.97699	3.48873	-0.57797	C	-0.55017	3.49005	-0.41795	C	-0.65184	3.21383	-0.30503	C	0.10598	3.45847	-0.2406	C	-0.83999	3.4361	-0.43506	C	4.34544	1.85868	0.34537	C	-0.32366	3.34081	-0.11561	C	-1.40421	3.41703	-0.55998	C	3.88735	1.99653	0.21507
C	-0.27741	3.25244	0.61461	C	0.25009	4.33251	-1.20806	C	-0.07345	2.39436	0.67832	C	0.33146	3.04572	1.08107	C	-0.30876	3.07525	0.81213	C	3.02705	2.15804	-0.03421	C	-0.07948	2.83719	1.17073	C	-0.60716	3.24066	0.58106	C	3.10451	2.18073	-0.93675
C	-2.27546	2.83641	-0.88339	C	-1.80967	2.95906	-1.00001	C	-2.09492	3.13804	-0.62399	C	-1.1568	3.15962	-0.96406	C	-2.13785	2.90922	-0.9285	C	4.85159	0.46622	0.35987	C	-1.55345	3.00445	-0.87755	C	-2.65723	2.65392	-0.78407	C	4.62284	0.73656	0.45044
O	-2.73868	2.0966	0.15263	O	-2.54794	2.27797	-0.09235	O	-2.77361	2.35344	0.25777	O	-2.08838	2.59652	-0.15974	O	-2.79349	2.19257	0.01499	O	4.00089	-0.38076	-0.28167	O	-2.45894	2.34132	-0.12027	O	-2.97123	1.85168	0.26353	O	4.37603	-0.17864	-0.53179
C	-3.98832	1.38145	-0.0374	C	-3.79331	1.68041	-0.54136	C	-4.05708	1.82794	-0.15719	C	-3.35985	2.21983	-0.75277	C	-4.03919	1.55079	-0.36522	C	4.19762	-1.80813	-0.15167	C	-3.64925	1.82782	-0.77406	C	-4.15673	1.02189	0.14192	C	4.53118	-1.57661	-0.19976
C	-4.61047	1.17473	1.35077	C	-4.70675	1.5654	0.68714	C	-4.87804	1.53629	1.10682	C	-4.40873	2.25404	0.36761	C	-4.86405	1.36556	0.91631	C	4.21155	-2.43884	-1.55405	C	-4.73717	1.69794	0.30136	C	-4.63478	0.70026	1.56452	C	4.49812	-2.35927	-1.51968
C	-3.77999	0.15827	2.13873	C	-4.14866	0.50477	1.6398	C	-4.26233	0.35741	1.86615	C	-4.14411	1.10939	1.34935	C	-4.20257	0.30718	1.80358	C	2.81574	-2.34892	-2.17596	C	-4.36637	0.5736	1.27314	C	-3.63726	-0.24584	2.23695	C	3.0946	-2.27342	-2.12861
O	-3.67531	-1.09152	1.43242	O	-4.00859	-0.76769	0.98223	O	-4.14624	-0.81096	1.02917	O	-4.14704	-0.16488	0.68049	O	-4.04459	-0.94071	1.10387	O	1.81913	-2.96495	-1.33444	O	-4.16118	-0.67333	0.58424	O	-3.45209	-1.44917	1.46507	O	2.08454	-2.75631	-1.22034
C	-3.06265	-0.9928	0.15805	C	-3.14758	-0.75777	-0.14344	C	-3.34011	-0.61863	-0.11943	C	-3.17651	-0.29426	-0.34419	C	-3.25058	-0.85737	-0.06735	C	1.71252	-2.38022	-0.0485	C	-3.134	-0.63799	-0.39231	C	-2.97264	-1.24134	0.15358	C	2.02681	-2.06827	0.01658
C	-3.73998	0.04131	-0.73966	C	-3.53475	0.30578	-1.16962	C	-3.82948	0.54856	-0.97636	C	-3.26569	0.82435	-1.38114	C	-3.75882	0.2038	-1.04216	C	3.04863	-2.37109	0.69478	C	-3.34959	0.47048	-1.42205	C	-3.83755	-0.26098	-0.63555	C	3.38465	-2.0199	0.72121
C	-3.11209	-2.4398	-0.37997	C	-3.2191	-2.21223	-0.65872	C	-3.3588	-1.99394	-0.82315	C	-3.43061	-1.71345	-0.89873	C	-3.26401	-2.30034	-0.61789	C	0.60527	-3.20155	0.64291	C	-3.12982	-2.071	-0.96916	C	-2.88831	-2.66755	-0.44131	C	0.94853	-2.82852	0.81295
C	-1.68052	-2.99526	-0.37554	C	-1.87503	-2.89063	-0.35264	C	-1.97046	-2.6336	-0.65096	C	-2.2609	-2.6092	-0.46294	C	-1.86247	-2.89715	-0.41783	C	-0.68813	-2.36783	0.65008	C	-1.83739	-2.76509	-0.50976	C	-1.40547	-3.0522	-0.52065	C	-0.32847	-1.9757	0.85296
C	-0.9736	-1.97371	0.5392	C	-1.26757	-1.89703	0.66084	C	-1.38956	-1.75881	0.47843	C	-1.61443	-1.73689	0.63444	C	-1.26135	-1.89979	0.5951	C	-0.27942	-1.13166	-0.17876	C	-1.39129	-1.82528	0.63082	C	-0.79109	-2.01452	0.44035	C	0.02962	-0.81488	-0.10587
O	-1.66774	-0.73397	0.26231	O	-1.78357	-0.61409	0.23324	O	-1.96699	-0.45867	0.22515	O	-1.85823	-0.38336	0.18175	O	-1.87872	-0.64011	0.23763	O	1.15938	-1.0741	-0.10494	O	-1.84607	-0.52189	0.19822	O	-1.59649	-0.83309	0.15844	O	1.47153	-0.76563	-0.12131
C	0.51829	-1.7414	0.31442	C	0.25388	-1.79557	0.71795	C	0.12856	-1.60425	0.53848	C	-0.11396	-1.89287	0.86011	C	0.25097	-1.70374	0.57336	C	-0.81572	0.20346	0.34529	C	0.10439	-1.72233	0.91331	C	0.68048	-1.66137	0.25201	C	-0.50243	0.55658	0.33996
C	1.04287	-1.93381	-1.11915	C	1.00711	-2.05258	-0.59343	C	0.87903	-1.64518	-0.80067	C	0.72787	-2.25743	-0.36876	C	0.94143	-1.85787	-0.7884	C	-2.20069	0.11659	1.00546	C	1.04075	-1.90239	-0.28725	C	1.23503	-1.72167	-1.18393	C	-1.83984	0.48609	1.09429
C	0.39793	-3.14358	-1.81794	C	0.42699	-3.25511	-1.35824	C	0.32522	-2.74055	-1.73045	C	0.04887	-3.34385	-1.22121	C	0.39543	-3.06739	-1.56769	C	-2.34447	-1.046	2.02483	C	0.5934	-3.06771	-1.18561	C	0.64718	-2.89101	-1.99424	C	-1.84154	-0.52025	2.27354
C	-1.1275	-3.03705	-1.82431	C	-1.05742	-3.04579	-1.66251	C	-1.17411	-2.55297	-1.98065	C	-1.33885	-2.89186	-1.67922	C	-1.11546	-2.95003	-1.77763	C	-1.14048	-1.99724	2.07277	C	-0.83506	-2.85374	-1.69187	C	-0.88402	-2.87568	-1.97782	C	-0.64756	-1.48763	2.27779
C	2.57086	-2.06922	-0.99904	C	2.49003	-2.25159	-0.21358	C	2.36732	-1.86168	-0.46767	C	2.10758	-2.6994	0.16257	C	2.4469	-1.97542	-0.49415	C	-3.21327	0.05632	-0.15375	C	2.45369	-2.1045	0.29748	C	2.76664	-1.79999	-1.04971	C	-2.91838	0.18991	0.03176
C	2.83599	-3.06779	0.13811	C	2.53427	-3.15178	1.02554	C	2.4431	-2.94063	0.62784	C	1.8738	-3.59769	1.38089	C	2.61527	-2.95143	0.68014	C	-2.8214	1.1694	-1.1412	C	2.33389	-3.08078	1.47506	C	3.06195	-2.86055	0.02067	C	-2.6134	1.05525	-1.2101
O	-4.09087	-3.08264	-0.67725	O	-4.1731	-2.77689	-1.13873	O	-4.29841	-2.54364	-1.347	O	-4.40479	-2.10709	-1.495	O	-4.20963	-2.91456	-1.05171	O	0.68283	-4.33601	1.05126	O	-4.00969	-2.61597	-1.59216	O	-3.80579	-3.40026	-0.72329	O	1.02902	-3.94246	1.27448
O	-1.63033	-4.29823	0.17712	O	-2.06035	-4.16682	0.23276	O	-2.07123	-3.98957	-0.25524	O	-2.71972	-3.83942	0.06767	O	-1.92894	-4.20317	0.12528	O	-1.72918	-3.0832	-0.00668	O	-2.09864	-4.0698	-0.02499	O	-1.18179	-4.37771	-0.08325	O	-1.42559	-2.73153	0.35228
O	-1.57983	-1.86019	-2.50584	O	-1.27281	-1.87336	-2.46106	O	-1.45568	-1.2893	-2.5943	O	-1.26829	-1.6971	-2.47206	O	-1.45783	-1.77077	-2.51889	O	-0.00065	-1.40956	2.71145	O	-0.95681	-1.649	-2.45699	O	-1.4224	-1.71569	-2.61319	O	0.55343	-0.8714	2.75594
O	3.0805	-0.76601	-0.72981	O	3.10273	-1.00462	0.13291	O	2.88718	-0.6015	-0.03321	O	2.87425	-1.57112	0.60905	O	2.92297	-0.67015	-0.14815	O	-4.52635	0.22201	0.37726	O	2.94875	-0.85507	0.79906	O	3.21378	-0.49672	-0.68559	O	-4.19358	0.49202	0.60197
C	-4.80512	2.48111	2.12787	C	-4.9414	2.90431	1.39466	C	-5.04839	2.76417	2.00791	C	-4.49256	3.60957	1.07743	C	-5.10746	2.67542	1.67355	C	5.27942	-1.83385	-2.47141	C	-5.02327	3.01339	1.03363	C	-4.8984	1.94953	2.41205	C	5.57458	-1.90969	-2.51364
O	-2.87288	2.9534	-1.94075	O	-2.15538	3.12163	-2.15861	O	-2.62709	3.66788	-1.58591	O	-1.34693	3.39953	-2.1451	O	-2.57709	3.09852	-2.05099	O	5.89213	0.10351	0.88228	O	-1.73877	3.28855	-2.04954	O	-3.33977	2.72876	-1.79219	O	5.30063	0.48185	1.43162
O	2.65344	5.41869	0.08699	O	3.00842	5.09335	1.0365	O	3.48643	3.04009	0.07389	O	3.71608	4.39596	1.61359	O	2.83619	4.98958	0.75706	O	2.99846	5.79352	0.49809	O	3.2254	4.31949	1.83306	O	2.09064	5.64107	-0.13653	O	1.02286	4.99819	0.11319
H	1.47748	3.69426	1.78255	H	2.05544	5.5187	-1.31027	H	1.75138	1.68798	1.57908	H	1.70225	3.01438	2.74201	H	1.32888	3.28806	2.19398	H	1.51566	3.66597	-0.25695	H	1.28783	2.74435	2.83167	H	1.18071	3.82819	1.6286	H	1.58297	3.3656	-1.89397
H	1.20452	5.69714	-2.01487	H	1.37119	3.45261	2.40137	H	2.21598	4.59719	-1.55108	H	3.08393	5.04997	-0.78809	H	1.67163	5.51328	-1.47254	H	5.36876	5.02416	1.13232	H	2.55901	5.1386	-0.51014	H	0.48189	5.7992	-2.131	H	2.77467	4.68399	2.01331
H	-0.97856	4.54712	-2.44701	H	-0.73775	2.52111	1.49856	H	-0.26945	4.66202	-1.84788	H	0.92771	4.49231	-1.93476	H	-0.53109	4.58562	-2.22323	H	6.20163	2.66307	1.07672	H	0.44358	4.5503	-1.71659	H	-1.62249	4.47231	-2.41867	H	4.4291	2.80684	2.13126
H	-0.68231	2.56389	1.34662	H	-0.07588	4.56456	-2.21651	H	-0.71137	1.7646	1.28529	H	-0.42995	2.47889	1.60344	H	-0.85198	2.38574	1.4471	H	2.36998	1.35516	-0.34628	H	-0.80695	2.18358	1.63666	H	-0.90261	2.52256	1.33669	H	3.17651	1.47172	-1.7519
H	-4.63318	2.00178	-0.66597	H	-4.22856	2.34421	-1.29349	H	-4.55175	2.57994	-0.77779	H	-3.59323	2.95116	-1.53144	H	-4.55299	2.21016	-1.07022	H	5.15275	-1.97455	0.35272	H	-3.94367	2.54368	-1.54649	H	-4.9107	1.59433	-0.40528	H	5.487	-1.71159	0.31541
H	-5.59485	0.71984	1.17299	H	-5.66917	1.19054	0.31204	H	-5.86816	1.2152	0.75422	H	-5.37316	2.04903	-0.11752	H	-5.83245	0.95894	0.5932	H	4.43501	-3.50452	-1.40398	H	-5.64678	1.3832	-0.2288	H	-5.57746	0.14823	1.44662	H	4.67666	-3.41068	-1.25515
H	-2.77704	0.55038	2.34799	H	-3.18094	0.81819	2.05041	H	-3.27621	0.62359	2.26534	H	-3.18891	1.25286	1.86927	H	-3.22708	0.65469	2.16536	H	2.54144	-1.30399	-2.36573	H	-3.46631	0.83304	1.84385	H	-2.66959	0.24789	2.38783	H	2.86221	-1.2426	-2.42223
H	-4.26144	-0.09475	3.08654	H	-4.83591	0.31761	2.46851	H	-4.90255	0.04432	2.69441	H	-4.94004	1.03648	2.09451	H	-4.82992	0.0676	2.66566	H	2.76658	-2.90195	-3.11714	H	-5.18022	0.37546	1.97497	H	-4.00922	-0.59083	3.20449	H	3.00785	-2.91697	-3.00755
H	-4.7118	-0.37543	-1.02888	H	-4.46343	-0.03036	-1.64529	H	-4.78356	0.24055	-1.41932	H	-4.17888	0.6509	-1.96223	H	-4.69992	-0.1703	-1.46169	H	3.27619	-3.41272	0.94865	H	-4.2138	0.18176	-2.03131	H	-4.78098	-0.77767	-0.84637	H	3.59545	-3.03799	1.06825
H	-3.15129	0.1804	-1.64756	H	-2.76582	0.36787	-1.94124	H	-3.12333	0.72875	-1.78942	H	-2.41646	0.76035	-2.06331	H	-3.04805	0.31967	-1.86176	H	2.94526	-1.80894	1.62629	H	-2.48073	0.53449	-2.07893	H	-3.37857	-0.0249	-1.59714	H	3.31994	-1.37577	1.6004
H	-1.15878	-2.26966	1.57971	H	-1.66937	-2.13898	1.65307	H	-1.76548	-2.14581	1.43447	H	-2.15964	-1.91167	1.57068	H	-1.59109	-2.19628	1.59905	H	-0.58855	-1.3204	-1.21663	H	-1.93166	-2.11812	1.54033	H	-0.97389	-2.33265	1.4734	H	-0.34027	-1.09348	-1.10332
H	0.76662	-0.73981	0.67868	H	0.51951	-0.81823	1.13373	H	0.36158	-0.68475	1.08349	H	0.2612	-0.97883	1.33181	H	0.47974	-0.72827	1.01459	H	-0.06822	0.64501	1.00596	H	0.29693	-0.76685	1.41198	H	0.85952	-0.67527	0.69195	H	0.27535	1.07184	0.90543
H	0.8178	-1.03385	-1.69948	H	0.91171	-1.16911	-1.23323	H	0.77318	-0.67616	-1.29751	H	0.84618	-1.36563	-0.99311	H	0.76995	-0.95428	-1.38146	H	-2.37739	1.06831	1.5186	H	1.04729	-0.98561	-0.88101	H	1.00575	-0.78053	-1.69678	H	-2.0531	1.49079	1.47391
H	0.76265	-3.21399	-2.85099	H	0.97568	-3.40079	-2.29761	H	0.85754	-2.71933	-2.69021	H	0.66667	-3.57138	-2.09943	H	0.89324	-3.14034	-2.5435	H	-2.49909	-0.64493	3.03303	H	1.27338	-3.15948	-2.04305	H	0.98829	-2.8299	-3.0334	H	-1.83852	0.01806	3.22833
H	0.66203	-4.08632	-1.32333	H	0.52664	-4.18501	-0.78368	H	0.47121	-3.74253	-1.3066	H	-0.06719	-4.28118	-0.66201	H	0.58942	-4.00986	-1.04001	H	-3.24115	-1.62658	1.78834	H	0.62076	-4.02796	-0.65413	H	0.97653	-3.85733	-1.59471	H	-2.7711	-1.09737	2.25313
H	-1.56873	-3.92929	-2.28823	H	-1.47208	-3.92485	-2.17291	H	-1.55667	-3.36774	-2.60932	H	-1.83269	-3.68826	-2.25083	H	-1.4988	-3.83912	-2.29527	H	-1.41813	-2.9284	2.58709	H	-1.15809	-3.71265	-2.29577	H	-1.27273	-3.72073	-2.55429	H	-0.88099	-2.37293	2.88638
H	3.00992	-2.44101	-1.9393	H	3.05082	-2.70743	-1.03939	H	2.90885	-2.19356	-1.36573	H	2.67842	-3.23496	-0.60453	H	2.99267	-2.33682	-1.37748	H	-3.15489	-0.92488	-0.64633	H	3.13078	-2.49997	-0.46749	H	3.23004	-2.08765	-2.00705	H	-2.89614	-0.87295	-0.23775
H	2.71729	-4.0997	-0.20772	H	2.60533	-4.20974	0.75809	H	2.51835	-3.94394	0.19766	H	1.81852	-4.65353	1.10222	H	2.69287	-3.98761	0.33631	H	-3.12818	0.97136	-2.16935	H	2.4479	-4.11993	1.15271	H	2.98253	-3.87079	-0.39343	H	-2.76694	0.52482	-2.15165
H	3.81946	-2.95315	0.59298	H	3.35261	-2.88944	1.6992	H	3.26182	-2.79878	1.33638	H	2.64256	-3.46099	2.14408	H	3.47686	-2.70794	1.30212	H	-3.22138	2.13376	-0.81687	H	3.04501	-2.86549	2.27494	H	4.03819	-2.73947	0.48961	H	-3.21313	1.96723	-1.2109
H	-2.46299	-4.74728	-0.04318	H	-2.86852	-4.55236	-0.14358	H	-2.88022	-4.35501	-0.64981	H	-3.5337	-4.08198	-0.40345	H	-2.73714	-4.62395	-0.21131	H	-1.66012	-4.01704	0.24791	H	-2.84613	-4.42934	-0.53058	H	-1.96591	-4.90372	-0.31112	H	-1.31993	-3.64694	0.65785
H	-1.49447	-1.9904	-3.459	H	-1.05494	-2.06962	-3.38117	H	-1.23837	-1.33409	-3.53421	H	-1.01478	-1.92866	-3.37451	H	-1.26919	-1.91611	-3.45474	H	-0.19032	-1.28215	3.64994	H	-0.46465	-1.74281	-3.28286	H	-1.22506	-0.93735	-2.07068	H	0.45149	-0.65085	3.69081
H	-5.32617	2.29598	3.07342	H	-5.65959	2.78957	2.21371	H	-5.69992	2.53545	2.85836	H	-5.30568	3.6134	1.81132	H	-5.76368	2.50965	2.53481	H	5.31021	-2.35966	-3.43192	H	-5.85637	2.8943	1.73484	H	-5.31245	1.67554	3.38831	H	5.56148	-2.5364	-3.41209
H	-5.40512	3.19232	1.54978	H	-5.34535	3.64717	0.69822	H	-5.50047	3.59337	1.4532	H	-4.68719	4.41377	0.3595	H	-5.58806	3.4163	1.02534	H	6.27188	-1.90764	-2.01513	H	-5.29415	3.80289	0.32415	H	-5.61887	2.60984	1.91744	H	6.57147	-1.98684	-2.0666
H	-3.84674	2.95806	2.35308	H	-4.01158	3.305	1.80891	H	-4.0851	3.10761	2.39631	H	-3.5603	3.84508	1.59912	H	-4.16959	3.10639	2.03605	H	5.07978	-0.77609	-2.6685	H	-4.149	3.35432	1.59597	H	-3.98022	2.52058	2.5777	H	5.4253	-0.86957	-2.81764
H	3.0389	5.1765	0.93978	H	3.18089	4.82057	1.94784	H	3.75085	2.21103	0.52483	H	3.75167	4.06684	2.52203	H	3.08875	4.67702	1.63634	H	2.07279	5.85852	0.22524	H	3.26761	3.92908	2.71661	H	2.55402	5.4331	0.686	H	0.24959	4.58654	-0.32729
S	1.56677	-2.80847	1.47523	S	0.96439	-2.9576	2.02323	S	0.8871	-2.91216	1.66587	S	0.24468	-3.1747	2.19652	S	1.11094	-2.86956	1.78609	S	-0.97388	1.42	-1.07981	S	0.6342	-2.94728	2.24627	S	1.77757	-2.73999	1.3609	S	-0.8584	1.66096	-1.13435
O	2.14136	-1.86108	2.52379	O	1.25389	-2.10892	3.25307	O	1.19184	-2.2298	2.99009	O	0.50772	-2.40338	3.48177	O	1.4351	-2.04464	3.02367	O	-0.73921	2.8223	-0.52187	O	0.73504	-2.1623	3.54695	O	2.29546	-1.82271	2.46328	O	-0.95994	3.09901	-0.6023
C	4.46982	-0.55848	-0.96383	C	3.63691	-0.27236	-0.9641	C	4.28911	-0.50013	0.05407	C	3.61119	-0.90912	-0.37866	C	4.21385	-0.35341	-0.57441	C	-5.58486	-0.33452	-0.39425	C	3.90185	-0.16987	0.02669	C	4.5955	-0.21175	-0.88715	C	-5.27931	-0.22744	0.09338
C	4.69397	0.94952	-1.09558	C	4.03977	1.10788	-0.44637	C	4.95675	-0.18422	-1.28625	C	4.22644	0.34447	0.22958	C	4.50407	1.09968	-0.21927	C	-6.82417	-0.41826	0.49929	C	5.30066	-0.7961	0.06393	C	4.75085	1.31031	-0.91936	C	-6.52184	0.12466	0.90263
C	4.57803	1.66147	0.25988	C	5.2878	1.03635	0.44591	C	6.46342	0.05874	-1.08341	C	5.15846	1.028	-0.78504	C	5.95963	1.45421	-0.56666	C	-7.45348	0.96072	0.74307	C	6.26837	0.01469	-0.81621	C	4.58803	1.92748	0.47721	C	-7.7639	-0.54925	0.2952
C	5.48781	0.97174	1.28702	C	6.40402	0.27113	-0.2809	C	6.69366	1.11388	0.0093	C	6.1648	0.0197	-1.36079	C	6.92636	0.42897	0.04588	C	-7.6853	1.66611	-0.60074	C	5.6861	0.19524	-2.22592	C	5.51799	1.21507	1.47028	C	-7.85951	-0.24968	-1.20873
C	5.17687	-0.52178	1.34216	C	5.88957	-1.08789	-0.75084	C	5.90921	0.75209	1.27009	C	5.43323	-1.22052	-1.87564	C	6.49367	-0.98992	-0.32452	C	-6.38391	1.70793	-1.39768	C	4.26333	0.74867	-2.14015	C	5.27581	-0.2915	1.42582	C	-6.53523	-0.58005	-1.89739
O	5.28663	-1.13672	0.0357	O	4.7161	-0.96037	-1.57511	O	4.50995	0.55947	0.97975	O	4.61904	-1.8036	-0.85311	O	5.13763	-1.23725	0.06249	O	-5.8226	0.39491	-1.58516	O	3.42924	-0.07345	-1.31466	O	5.42615	-0.81584	0.08424	O	-5.44357	0.11472	-1.28267
H	4.75749	-1.084	-1.88515	H	2.88925	-0.19078	-1.76323	H	4.71633	-1.42348	0.4863	H	2.96537	-0.64198	-1.2382	H	4.2987	-0.51346	-1.66932	H	-5.28388	-1.3291	-0.74816	H	3.93532	0.83809	0.46898	H	4.91601	-0.66281	-1.83639	H	-5.06924	-1.31441	0.14768
H	5.70287	1.09302	-1.50204	H	4.24493	1.7373	-1.32067	H	4.7923	-1.00957	-1.98909	H	3.42498	1.01935	0.54705	H	3.79882	1.74905	-0.74825	H	-7.54704	-1.06707	-0.01052	H	5.64425	-0.82739	1.10384	H	5.75645	1.52519	-1.30159	H	-6.37298	-0.18231	1.94361
H	4.84648	2.71844	0.14584	H	5.61908	2.04811	0.70595	H	6.95074	-0.88302	-0.79247	H	4.55889	1.45197	-1.603	H	6.08362	1.46388	-1.65908	H	-8.39499	0.85067	1.29274	H	6.43099	1.00222	-0.36155	H	4.81015	3.00067	0.43613	H	-7.70223	-1.63655	0.44622
H	6.54059	1.11759	1.00998	H	6.74633	0.84625	-1.15137	H	7.75881	1.19504	0.25745	H	6.7454	0.4683	-2.1765	H	7.95252	0.60194	-0.30145	H	-8.44745	1.12843	-1.17995	H	6.30743	0.87441	-2.82256	H	6.56548	1.42632	1.21667	H	-8.66813	-0.82821	-1.67216
H	5.8997	-1.06052	1.96027	H	6.61987	-1.60415	-1.3793	H	6.30229	-0.16822	1.72894	H	4.80458	-0.9594	-2.74478	H	6.60142	-1.15097	-1.4112	H	-6.53807	2.09402	-2.40841	H	4.27354	1.77412	-1.73595	H	6.01707	-0.83514	2.01711	H	-6.34535	-1.6665	-1.86277
H	3.98173	1.35252	-1.82252	H	3.1896	1.54771	0.08363	H	4.47122	0.70803	-1.69791	H	4.78296	0.03702	1.12292	H	4.32411	1.21421	0.85611	H	-6.5487	-0.9062	1.4397	H	5.2452	-1.82983	-0.29944	H	4.02948	1.7262	-1.62987	H	-6.62793	1.21564	0.88828
H	3.53733	1.62451	0.60362	H	5.03993	0.52598	1.38452	H	6.92539	0.37082	-2.02604	H	5.67605	1.86946	-0.31236	H	6.1934	2.46642	-0.21939	H	-6.78557	1.56624	1.368	H	7.24761	-0.47488	-0.85726	H	3.5468	1.82117	0.80533	H	-8.66675	-0.21327	0.81654
H	5.35073	1.40126	2.28723	H	7.27175	0.12263	0.37374	H	6.36453	2.09791	-0.34563	H	6.87527	-0.28693	-0.58274	H	6.92961	0.52348	1.13905	H	-8.05022	2.68976	-0.45205	H	5.66361	-0.76993	-2.74855	H	5.35075	1.5731	2.49362	H	-8.08491	0.81267	-1.36523
H	4.17314	-0.70002	1.74831	H	5.66174	-1.72834	0.11283	H	5.94203	1.54648	2.01926	H	6.12791	-2.00639	-2.18384	H	7.09031	-1.74695	0.19092	H	-5.6511	2.35078	-0.89085	H	3.77537	0.7759	-3.11789	H	4.27769	-0.54123	1.80704	H	-6.53072	-0.26845	-2.94499

## Sheet: Compound 2
Table S2 Calculated energies and cartesian coordinates for the optimized conformers for 2′
Compound 2′
conformer 1				conformer 2				conformer 3				conformer 4				conformer 5				conformer 6				conformer 7				conformer 8				conformer 9				conformer 10
Energy (Hartree)				Energy (Hartree)				Energy (Hartree)				Energy (Hartree)				Energy (Hartree)				Energy (Hartree)				Energy (Hartree)				Energy (Hartree)				Energy (Hartree)				Energy (Hartree)
-2274.44				-2273.44				-2272.44				-2271.44				-2270.44				-2269.44				-2268.44				-2267.44				-2266.44				-2265.44
atom	X axis (Å)	Y axis (Å)	Z axis (Å)	atom	X axis (Å)	Y axis (Å)	Z axis (Å)	atom	X axis (Å)	Y axis (Å)	Z axis (Å)	atom	X axis (Å)	Y axis (Å)	Z axis (Å)	atom	X axis (Å)	Y axis (Å)	Z axis (Å)	atom	X axis (Å)	Y axis (Å)	Z axis (Å)	atom	X axis (Å)	Y axis (Å)	Z axis (Å)	atom	X axis (Å)	Y axis (Å)	Z axis (Å)	atom	X axis (Å)	Y axis (Å)	Z axis (Å)	atom	X axis (Å)	Y axis (Å)	Z axis (Å)
C	-0.88822	5.21298	0.7448	C	-0.7431	4.1458	-0.97431	C	-1.31428	2.41453	-0.9563	C	-1.48893	3.66177	-1.72709	C	-0.17161	5.37288	0.87581	C	1.77092	-2.8371	0.35502	C	-0.56493	3.88113	-1.87092	C	0.55393	5.247	-1.18503	C	1.78139	-2.71506	0.45801	C	-0.55118	5.24893	1.18438
C	-1.36422	4.96067	-0.54906	C	-1.236	5.05431	-0.029	C	-2.17146	3.15747	-0.13123	C	-2.47829	4.32803	-0.99197	C	-0.79086	5.14147	-0.35995	C	1.80245	-2.82907	-1.04876	C	-1.41662	4.75427	-1.18216	C	1.22858	5.05612	0.02836	C	1.87676	-2.64851	-0.94034	C	-1.22531	5.05897	-0.02944
C	-0.7044	4.04381	-1.37763	C	-0.56245	5.24535	1.18497	C	-1.63787	4.02391	0.83517	C	-2.26688	4.63659	0.35866	C	-0.30983	4.14141	-1.21446	C	0.60924	-2.97354	-1.77242	C	-1.18846	5.04369	0.16969	C	0.73756	4.14637	0.97345	C	0.71907	-2.77072	-1.72437	C	-0.73453	4.14903	-0.97449
C	0.42989	3.38782	-0.91136	C	0.60162	4.52938	1.44714	C	-0.262	4.0792	1.0261	C	-1.06794	4.27963	0.96315	C	0.78982	3.38077	-0.83238	C	-0.60632	-3.01495	-1.09925	C	-0.11111	4.45792	0.82279	C	-0.42576	3.43403	0.70281	C	-0.5275	-2.84801	-1.11147	C	0.42802	3.43563	-0.70339
C	0.9192	3.63339	0.38267	C	1.10757	3.61871	0.50859	C	0.60215	3.28949	0.24888	C	-0.06488	3.61487	0.23781	C	1.42171	3.60397	0.40255	C	-0.65211	-2.95357	0.30386	C	0.7526	3.58163	0.14487	C	-1.11341	3.61769	-0.50851	C	-0.63734	-2.84637	0.28892	C	1.11514	3.61837	0.50837
C	0.2463	4.55013	1.20314	C	0.421	3.43487	-0.70331	C	0.06014	2.47816	-0.76067	C	-0.28916	3.30975	-1.11248	C	0.9267	4.60495	1.25055	C	0.55208	-2.90264	1.02149	C	0.513	3.29929	-1.20759	C	-0.60936	4.52963	-1.44684	C	0.53292	-2.81792	1.06238	C	0.61133	4.53048	1.44667
C	2.12835	2.96109	0.92611	C	2.35719	2.88739	0.84396	C	2.03908	3.22769	0.60563	C	1.19741	3.26258	0.93943	C	2.59961	2.81965	0.85624	C	-1.9201	-2.7753	1.05243	C	1.88367	2.98103	0.89909	C	-2.36217	2.88474	-0.84353	C	-1.93788	-2.71881	0.99382	C	2.36315	2.88435	0.84386
O	2.74032	2.17448	0.01078	O	2.78241	2.09425	-0.16686	O	2.74714	2.44816	-0.25555	O	2.10795	2.69535	0.11457	O	3.04505	1.95827	-0.08803	O	-2.94465	-2.44297	0.2269	O	2.67607	2.21027	0.11789	O	-2.78573	2.09058	0.1672	O	-2.94164	-2.36222	0.15434	O	2.78634	2.08973	-0.16666
C	3.92202	1.44199	0.44027	C	3.98935	1.31357	0.05843	C	4.02074	1.92424	0.19792	C	3.37309	2.27556	0.69778	C	4.17938	1.11524	0.25716	C	-4.11132	-1.7898	0.78944	C	3.78323	1.51893	0.75961	C	-3.99163	1.30821	-0.05776	C	-4.12907	-1.76249	0.73942	C	3.99163	1.30652	0.05867
C	4.77896	1.18302	-0.80616	C	4.61843	1.03603	-1.31359	C	4.86981	1.61837	-1.0433	C	4.40981	2.25197	-0.4334	C	4.91022	0.76958	-1.04737	C	-5.09921	-1.62585	-0.37413	C	4.8369	1.24254	-0.32144	C	-4.61985	1.02964	1.31444	C	-5.1608	-1.62609	-0.3892	C	4.61992	1.02744	-1.31338
C	4.08464	0.15384	-1.70158	C	3.74931	0.03949	-2.08474	C	4.25847	0.44275	-1.81146	C	4.0984	1.09711	-1.38919	C	4.05689	-0.19487	-1.87469	C	-4.49559	-0.66487	-1.40583	C	4.31329	0.17662	-1.28811	C	-3.74903	0.03429	2.0852	C	-4.68442	-0.57507	-1.40023	C	3.74838	0.03281	-2.08423
O	3.83039	-1.07138	-0.99274	O	3.57378	-1.18279	-1.34762	O	4.10299	-0.7205	-0.97621	O	4.06546	-0.16366	-0.69832	O	3.74591	-1.38671	-1.1325	O	-4.14589	0.6071	-0.82854	O	3.95758	-1.0328	-0.59668	O	-3.572	-1.18766	1.34789	O	-4.40946	0.69309	-0.77664	O	3.57059	-1.18909	-1.34703
C	3.00706	-0.93153	0.15086	C	2.95527	-1.02526	-0.08332	C	3.28906	-0.5184	0.16372	C	3.10754	-0.2439	0.3416	C	3.02381	-1.16241	0.06523	C	-3.27394	0.55898	0.28463	C	2.95576	-0.87292	0.3923	C	-2.95404	-1.02909	0.08344	C	-3.4289	0.63204	0.24509	C	2.95272	-1.03028	-0.08256
C	3.5208	0.1289	1.1211	C	3.65754	0.00947	0.79186	C	3.77118	0.65113	1.01951	C	3.23435	0.89545	1.34933	C	3.7047	-0.14914	0.98163	C	-3.74461	-0.41342	1.36326	C	3.29921	0.2161	1.40554	C	-3.65811	0.00468	-0.79141	C	-3.79549	-0.38359	1.32756	C	3.65703	0.00329	0.79235
C	2.94278	-2.35658	0.7576	C	2.94465	-2.45173	0.52313	C	3.28016	-1.88555	0.89471	C	3.32178	-1.65091	0.95619	C	2.87091	-2.57055	0.69458	C	-3.16693	2.03389	0.74636	C	2.7984	-2.28267	1.01762	C	-2.94136	-2.45547	-0.52317	C	-3.28873	2.08511	0.74561	C	2.93961	-2.45666	0.52401
C	1.59269	-2.9862	0.35614	C	1.52821	-3.03633	0.34358	C	1.9535	-2.6031	0.55357	C	2.21215	-2.5802	0.42171	C	1.44541	-3.07655	0.39142	C	-1.82704	2.60514	0.22902	C	1.51781	-2.92144	0.44121	C	-1.52412	-3.03806	-0.34371	C	-1.89697	2.6101	0.34076	C	1.52247	-3.03923	0.34351
C	1.05928	-1.91741	-0.63072	C	0.87499	-1.94243	-0.53766	C	1.37336	-1.63992	-0.51055	C	1.54967	-1.66007	-0.63418	C	0.94439	-1.96779	-0.56786	C	-1.31711	1.42471	-0.63489	C	1.148	-1.88803	-0.65209	C	-0.87231	-1.94319	0.53738	C	-1.47375	1.5593	-0.70657	C	0.87094	-1.9438	-0.53711
O	1.65298	-0.67321	-0.20215	O	1.57101	-0.72126	-0.20727	O	1.91988	-0.34632	-0.18941	O	1.78025	-0.31408	-0.16599	O	1.67804	-0.78146	-0.19358	O	-1.93328	0.24728	-0.08218	O	1.67861	-0.63044	-0.18348	O	-1.57019	-0.72305	0.20708	O	-2.13927	0.3458	-0.2762	O	1.56894	-0.72391	-0.20616
C	-0.45374	-1.72223	-0.68929	C	-0.6203	-1.70172	-0.34749	C	-0.14786	-1.50541	-0.57434	C	0.04886	-1.82877	-0.85555	C	-0.54477	-1.63654	-0.52614	C	0.19805	1.19673	-0.68292	C	-0.33728	-1.68862	-0.94281	C	0.62259	-1.7003	0.34698	C	0.00781	1.19292	-0.82445	C	-0.62402	-1.70096	-0.34696
C	-1.24448	-1.98659	0.6026	C	-1.20255	-1.96119	1.05225	C	-0.92706	-1.70479	0.73664	C	-0.78902	-2.28025	0.35197	C	-1.26628	-1.82109	0.81936	C	1.02127	1.64694	0.53858	C	-1.31213	-1.88916	0.22754	C	1.20509	-1.95912	-1.05279	C	0.90615	1.43609	0.40607	C	-1.20708	-1.96111	1.05233
C	-0.75137	-3.25188	1.32793	C	-0.63464	-3.24782	1.67834	C	-0.38045	-2.8939	1.54859	C	-0.09345	-3.40189	1.14462	C	-0.8423	-3.12453	1.52037	C	0.53767	3.00221	1.08837	C	-0.94996	-3.12746	1.06717	C	0.63886	-3.24653	-1.67877	C	0.50415	2.7186	1.15385	C	-0.64105	-3.24908	1.67734
C	0.73631	-3.16264	1.65134	C	0.88754	-3.2015	1.75894	C	1.10371	-2.71715	1.85981	C	1.28858	-2.96831	1.62158	C	0.66578	-3.1711	1.74273	C	-0.93808	2.94835	1.4652	C	0.47677	-3.04525	1.60104	C	-0.88342	-3.20231	-1.75936	C	-0.96399	2.67844	1.57809	C	0.88117	-3.20461	1.75872
C	-2.71862	-2.09254	0.17077	C	-2.724	-2.02235	0.85531	C	-2.3944	-1.89845	0.32621	C	-2.14355	-2.7225	-0.22837	C	-2.76386	-1.79364	0.48398	C	2.48791	1.71382	0.08546	C	-2.70558	-2.00452	-0.41652	C	2.72662	-2.0183	-0.85576	C	2.38422	1.46246	-0.07375	C	-2.72854	-2.02018	0.85494
C	-2.775	-2.99797	-1.06452	C	-2.99375	-2.94935	-0.34243	C	-2.42627	-2.87739	-0.86303	C	-1.86246	-3.60128	-1.45129	C	-2.98938	-2.71917	-0.72301	C	2.53188	2.34771	-1.32003	C	-2.59009	-2.97416	-1.60099	C	2.99731	-2.94568	0.34142	C	2.42724	1.20561	-1.59335	C	-2.99918	-2.94538	-0.34403
O	3.77347	-2.84894	1.48247	O	3.86491	-2.97448	1.10448	O	4.12504	-2.2805	1.66142	O	4.16451	-1.93939	1.7713	O	3.69933	-3.13093	1.37145	O	-3.95466	2.60809	1.45939	O	3.51558	-2.75782	1.86493	O	-3.86087	-2.97943	-1.10467	O	-4.13517	2.75786	1.2838	O	3.85861	-2.98058	1.10636
O	1.80186	-4.24254	-0.24737	O	1.59685	-4.29274	-0.29182	O	2.21751	-3.89338	0.04918	O	2.77754	-3.74429	-0.13621	O	1.49939	-4.34902	-0.21204	O	-2.05514	3.77728	-0.52343	O	1.80281	-4.20012	-0.07891	O	-1.59068	-4.29453	0.29165	O	-2.00269	3.89318	-0.24294	O	1.58946	-4.29522	-0.29279
O	0.90623	-2.08177	2.58076	O	1.23543	-2.13649	2.65582	O	1.22372	-1.56602	2.7063	O	1.09962	-1.88806	2.54856	O	0.99593	-2.11144	2.65274	O	-1.06577	1.99356	2.52737	O	0.53098	-1.93992	2.51491	O	-1.23284	-2.13804	-2.65622	O	-1.25761	1.5412	2.40351	O	1.22988	-2.14078	2.65639
O	-3.2346	-0.81357	-0.22595	O	-3.17057	-0.68465	0.61568	O	-2.90596	-0.61187	-0.04696	O	-2.89632	-1.59058	-0.69877	O	-3.10418	-0.44009	0.15146	O	3.01639	0.38036	0.07021	O	-3.11635	-0.73434	-0.94967	O	3.17133	-0.6802	-0.61493	O	3.1061	0.47938	0.69494	O	-3.17341	-0.6816	0.6171
C	5.13802	2.46104	-1.5717	C	4.89155	2.30774	-2.12378	C	5.07665	2.8394	-1.94599	C	4.5341	3.58958	-1.17072	C	5.32748	2.00414	-1.85361	C	-5.50985	-2.95608	-1.01499	C	5.29805	2.50596	-1.05586	C	-4.89456	2.30089	2.12485	C	-5.49311	-2.95726	-1.07217	C	4.89584	2.29843	-2.12377
O	2.53592	3.10447	2.0669	O	2.94647	2.99198	1.90695	O	2.53787	3.76409	1.58077	O	1.40102	3.46556	2.12471	O	3.12001	2.93975	1.95313	O	-2.0356	-2.84076	2.26441	O	2.08661	3.16153	2.08814	O	-2.95213	2.98885	-1.90619	O	-2.08848	-2.84272	2.19766	O	2.95285	2.98805	1.9067
O	-2.47207	5.57773	-1.05744	O	-2.38354	5.72554	-0.34566	O	-3.52507	3.05684	-0.22837	O	-3.67458	4.6986	-1.53782	O	-1.87322	5.85993	-0.78454	O	2.9577	-2.67884	-1.74989	O	-2.49207	5.35248	-1.77731	O	2.3755	5.72862	0.3446	O	3.06123	-2.45292	-1.58344	O	-2.3714	5.7326	-0.3462
H	-1.40239	5.92486	1.38676	H	-1.27966	4.01374	-1.90799	H	-1.73568	1.76659	-1.71914	H	-1.65655	3.42119	-2.77462	H	-0.54751	6.14962	1.53816	H	2.69902	-2.75564	0.91179	H	-0.74661	3.6558	-2.91955	H	0.93734	5.95352	-1.91788	H	2.68037	-2.6473	1.06218	H	-0.93442	5.95558	1.91721
H	-1.08969	3.86324	-2.37569	H	-0.94731	5.95091	1.91798	H	-2.3153	4.60703	1.45049	H	-3.04494	5.15432	0.90967	H	-0.80608	3.9766	-2.16503	H	0.65357	-2.99559	-2.85656	H	-1.85838	5.72465	0.68407	H	1.27496	4.01445	1.90666	H	0.8133	-2.75021	-2.80549	H	-1.2715	4.01783	-1.90805
H	0.94237	2.67643	-1.54826	H	1.13459	4.66537	2.38217	H	0.16107	4.70604	1.80426	H	-0.88703	4.5113	2.00745	H	1.16287	2.60325	-1.48851	H	-1.531	-3.06093	-1.66241	H	0.07972	4.66898	1.86967	H	-0.8072	2.72652	1.4296	H	-1.42513	-2.87504	-1.71826	H	0.80927	2.72799	-1.43015
H	0.62692	4.73374	2.20229	H	0.8039	2.72833	-1.43028	H	0.72406	1.86953	-1.36143	H	0.4759	2.79124	-1.67815	H	1.41612	4.77003	2.20453	H	0.51258	-2.86905	2.10542	H	1.16866	2.61735	-1.73591	H	-1.14312	4.66544	-2.38144	H	0.44342	-2.83223	2.14358	H	1.14468	4.6656	2.3816
H	4.45614	2.07115	1.15723	H	4.65838	1.91526	0.67946	H	4.50035	2.68209	0.82302	H	3.64365	3.00987	1.46142	H	4.82564	1.69134	0.92459	H	-4.52233	-2.42459	1.58107	H	4.18152	2.18045	1.53379	H	-4.66169	1.90898	-0.67856	H	-4.49428	-2.42331	1.53169	H	4.66198	1.90687	0.67956
H	5.70525	0.71919	-0.43977	H	5.5753	0.53684	-1.1071	H	5.84698	1.28782	-0.6647	H	5.37109	2.02353	0.0473	H	5.8145	0.22269	-0.74624	H	-5.99275	-1.14459	0.04616	H	5.69719	0.80656	0.20506	H	-5.57606	0.52909	1.10824	H	-6.07199	-1.23562	0.08457	H	5.57566	0.52606	-1.107
H	3.14379	0.55594	-2.09881	H	2.77013	0.47697	-2.31846	H	3.2873	0.72428	-2.23751	H	3.14275	1.26506	-1.90233	H	3.12948	0.29097	-2.20418	H	-3.61042	-1.1133	-1.87278	H	3.44766	0.55291	-1.84836	H	-2.77041	0.47317	2.31862	H	-3.78903	-0.92692	-1.92721	H	2.77003	0.47239	-2.31747
H	4.72349	-0.13349	-2.54036	H	4.22949	-0.26157	-3.01913	H	4.91522	0.11861	-2.62246	H	4.8836	0.98553	-2.14104	H	4.6	-0.54523	-2.75594	H	-5.22062	-0.42404	-2.18721	H	5.08663	-0.12285	-1.99993	H	-4.22844	-0.26756	3.01973	H	-5.46331	-0.36167	-2.1365	H	4.22747	-0.26924	-3.01887
H	4.41	-0.2918	1.60458	H	4.59824	-0.44577	1.12249	H	4.71242	0.33847	1.48534	H	4.14073	0.70031	1.93395	H	4.58195	-0.65049	1.4065	H	-4.6409	0.01752	1.82307	H	4.10834	-0.17796	2.03119	H	-4.5982	-0.45198	-1.12181	H	-4.68645	-0.00399	1.8404	H	4.59668	-0.45385	1.12334
H	2.77452	0.31297	1.89708	H	3.05527	0.21307	1.67997	H	3.05112	0.84772	1.81801	H	2.38449	0.87944	2.035	H	3.03727	0.11132	1.80619	H	-2.98014	-0.50596	2.13651	H	2.43836	0.40504	2.05049	H	-3.05641	0.20931	-1.67966	H	-2.98986	-0.44976	2.05899	H	3.05503	0.20844	1.68028
H	1.44995	-2.16967	-1.62524	H	1.08924	-2.19724	-1.58375	H	1.76681	-1.9577	-1.48533	H	2.09343	-1.80337	-1.57716	H	1.24114	-2.25872	-1.58395	H	-1.70549	1.57824	-1.65035	H	1.68142	-2.17756	-1.56724	H	-1.08601	-2.19829	1.58352	H	-1.87292	1.87725	-1.67867	H	1.08483	-2.19845	-1.58332
H	-0.65882	-0.71205	-1.05875	H	-0.84965	-0.67969	-0.6662	H	-0.39171	-0.53147	-1.01017	H	-0.34844	-0.89327	-1.26307	H	-0.68426	-0.61377	-0.89151	H	0.38085	0.13834	-0.89983	H	-0.47471	-0.69416	-1.38035	H	0.85042	-0.67787	0.66544	H	0.02551	0.12977	-1.09336	H	-0.85169	-0.6782	-0.66454
H	-1.11629	-1.13194	1.27519	H	-0.96433	-1.11327	1.70155	H	-0.84963	-0.79519	1.33974	H	-0.93402	-1.42473	1.02018	H	-1.03255	-0.97316	1.47061	H	0.9329	0.89302	1.32617	H	-1.29588	-1.00454	0.86809	H	0.96575	-1.11157	-1.70217	H	0.79891	0.58355	1.08205	H	-0.96802	-1.11416	1.70259
H	-1.30439	-3.38019	2.26477	H	-1.03226	-3.37332	2.69144	H	-0.92355	-2.97545	2.49652	H	-0.69685	-3.66573	2.02005	H	-1.33874	-3.19986	2.49418	H	1.11331	3.2628	1.98344	H	-1.63359	-3.20654	1.91962	H	1.0366	-3.37152	-2.69188	H	1.13675	2.83956	2.04396	H	-1.03929	-3.3751	2.69013
H	-0.91739	-4.14539	0.71726	H	-0.91859	-4.13097	1.0969	H	-0.50894	-3.83631	1.00587	H	0.02003	-4.30314	0.53339	H	-1.12815	-4.0015	0.93062	H	0.68043	3.80013	0.35204	H	-1.04053	-4.04691	0.47905	H	0.92397	-4.1293	-1.09732	H	0.65747	3.5941	0.51239	H	-0.92578	-4.13128	1.09484
H	1.08042	-4.10318	2.09621	H	1.27066	-4.15627	2.13674	H	1.48457	-3.60793	2.37234	H	1.79588	-3.80577	2.11371	H	0.95062	-4.13963	2.16935	H	-1.27693	3.9362	1.79784	H	0.73633	-3.97645	2.11756	H	-1.26518	-4.15779	-2.13676	H	-1.23303	3.60184	2.10818	H	1.263	-4.16021	2.13575
H	-3.3456	-2.5032	0.97141	H	-3.22563	-2.41604	1.75178	H	-2.97665	-2.30288	1.16538	H	-2.74365	-3.27458	0.50308	H	-3.37204	-2.12466	1.33684	H	3.06536	2.32734	0.78985	H	-3.44003	-2.37184	0.30776	H	3.22899	-2.41064	-1.7524	H	2.82567	2.44476	0.13576	H	-3.23079	-2.41442	1.75083
H	-2.83213	-4.06058	-0.81595	H	-2.98271	-4.00712	-0.06532	H	-2.46372	-3.92535	-0.55317	H	-1.70649	-4.65214	-1.19557	H	-3.10405	-3.76913	-0.44	H	2.6551	3.43395	-1.29853	H	-2.68335	-4.02255	-1.30645	H	2.98621	-4.00334	0.06391	H	3.27692	1.66953	-2.09783	H	-2.98969	-4.00349	-0.06818
H	-3.60196	-2.72667	-1.72344	H	-3.93256	-2.71357	-0.84276	H	-3.24883	-2.67736	-1.55309	H	-2.65686	-3.51428	-2.19467	H	-3.84297	-2.39844	-1.31937	H	3.30972	1.90642	-1.94752	H	-3.31145	-2.74372	-2.38694	H	3.93636	-2.71003	0.84132	H	2.40977	0.13747	-1.82536	H	-3.9375	-2.70764	-0.84439
H	1.05804	-4.40901	-0.8684	H	0.766	-4.42164	-0.802	H	1.48306	-4.14014	-0.55422	H	2.16118	-4.08085	-0.82452	H	0.70512	-4.44679	-0.78438	H	-1.3316	3.85845	-1.18201	H	1.15586	-4.38734	-0.79532	H	-0.75983	-4.42185	0.80223	H	-2.71559	4.36717	0.21558	H	0.75875	-4.4223	-0.80365
H	1.70989	-2.23692	3.09377	H	2.11075	-2.31457	3.02374	H	2.04595	-1.63428	3.20905	H	1.85906	-1.85445	3.14465	H	1.82438	-2.33258	3.09777	H	-1.88025	2.17682	3.01379	H	1.25008	-2.0923	3.14164	H	-2.10842	-2.31661	-3.02325	H	-0.83478	1.65359	3.26458	H	2.10536	-2.3193	3.02366
H	5.81996	2.23827	-2.3994	H	5.41709	2.06892	-3.05466	H	5.74572	2.59857	-2.77928	H	5.34109	3.5511	-1.91035	H	5.91993	1.71386	-2.72799	H	-6.25681	-2.79602	-1.80014	H	6.10691	2.27368	-1.75706	H	-5.41915	2.06116	3.05603	H	-6.28407	-2.82508	-1.81846	H	5.42267	2.05852	-3.05363
H	5.63571	3.1822	-0.91426	H	5.51817	3.00426	-1.55612	H	5.52538	3.66596	-1.38473	H	4.76177	4.40067	-0.47052	H	5.93948	2.67859	-1.24483	H	-5.94852	-3.62733	-0.2687	H	5.67419	3.25264	-0.34802	H	-5.52267	2.99639	1.5576	H	-5.84395	-3.69283	-0.3402	H	5.52226	2.99457	-1.55543
H	4.24685	2.94388	-1.98355	H	3.96252	2.82618	-2.37881	H	4.12727	3.19283	-2.35931	H	3.60627	3.84732	-1.69001	H	4.4563	2.56663	-2.20229	H	-4.65026	-3.46657	-1.45912	H	4.47821	2.96248	-1.61838	H	-3.96623	2.82083	2.37934	H	-4.61625	-3.37746	-1.5735	H	3.96783	2.8178	-2.38065
H	-2.83225	6.20149	-0.4127	H	-2.61755	6.33856	0.36418	H	-3.76869	2.2179	-0.67015	H	-3.70438	4.45828	-2.4737	H	-2.10314	6.53339	-0.13038	H	3.59523	-2.14583	-1.23353	H	-2.53769	5.10376	-2.71027	H	2.60786	6.34285	-0.36475	H	3.67985	-1.93855	-1.0251	H	-2.60379	6.34666	0.36329
S	-1.17549	-2.84735	-2.00862	S	-1.5814	-2.78914	-1.54529	S	-0.8223	-2.74887	-1.80567	S	-0.24552	-3.08457	-2.22	S	-1.45554	-2.7047	-1.77844	S	0.88844	2.11027	-2.16711	S	-0.86889	-2.86529	-2.30817	S	1.58545	-2.78599	1.54494	S	0.89019	1.96301	-2.28205	S	-1.58628	-2.7856	-1.54626
O	-0.46694	-4.20944	-1.8854	O	-0.8792	-4.15998	-1.58335	O	-0.07769	-4.07506	-1.57164	O	0.73951	-4.24648	-1.98918	O	-0.85196	-4.12073	-1.69405	O	0.21612	3.49517	-2.1927	O	-0.19779	-4.22474	-2.033	O	0.88461	-4.15748	1.58443	O	1.02004	3.46538	-2.07487	O	-0.88582	-4.15729	-1.58581
C	-3.75248	-0.01506	0.83621	C	-4.54138	-0.40963	0.8763	C	-4.30918	-0.48966	-0.0795	C	-3.68576	-0.94818	0.26492	C	-4.392	-0.01836	0.49107	C	4.41604	0.2847	0.19403	C	-4.01306	0.04328	-0.19039	C	4.54122	-0.40249	-0.87757	C	4.49043	0.44226	0.55406	C	-4.5447	-0.40599	0.87474
C	-4.03149	1.3787	0.27389	C	-4.68368	1.09488	1.11471	C	-4.90165	-0.09493	1.27349	C	-4.24626	0.33587	-0.33298	C	-4.49472	1.48336	0.25435	C	4.86975	0.20651	1.65269	C	-5.45224	-0.48465	-0.19749	C	4.68077	1.10284	-1.11243	C	5.13114	0.01261	1.8694	C	-4.68603	1.0978	1.11817
C	-5.25162	1.38206	-0.65882	C	-4.54008	1.8976	-0.18605	C	-6.4116	0.16976	1.13685	C	-5.22796	0.99448	0.65161	C	-5.93425	1.96643	0.49961	C	6.37983	-0.07381	1.73755	C	-6.34933	0.41448	0.67195	C	4.5389	1.90205	0.19066	C	6.64818	-0.18019	1.70288	C	-4.53731	1.90504	-0.17922
C	-6.446	0.72074	0.04492	C	-5.49488	1.33354	-1.24774	C	-6.67616	1.17617	0.00679	C	-6.27928	-0.01947	1.12913	C	-6.9343	1.11211	-0.29472	C	6.7392	-1.30722	0.89617	C	-5.73809	0.5871	2.0703	C	5.49688	1.33669	1.24877	C	6.95261	-1.10768	0.51677	C	-5.48931	1.34592	-1.24604
C	-6.05292	-0.66276	0.55856	C	-5.26761	-0.16723	-1.41028	C	-5.96962	0.73421	-1.27398	C	-5.59639	-1.28999	1.63687	C	-6.68999	-0.37266	-0.02533	C	6.18146	-1.16268	-0.51817	C	-4.28266	1.04041	1.95563	C	5.27205	-0.16479	1.40806	C	6.21719	-0.62676	-0.73253	C	-5.26345	-0.15455	-1.41317
O	-4.89955	-0.60761	1.41789	O	-5.39247	-0.8728	-0.16076	O	-4.55869	0.52127	-1.05333	O	-4.73037	-1.84417	0.63928	O	-5.33311	-0.73526	-0.31024	O	4.76369	-0.90837	-0.50105	O	-3.51782	0.14664	1.13665	O	5.39506	-0.86711	0.15654	O	4.80381	-0.50658	-0.48764	O	-5.39323	-0.86434	-0.16654
H	-3.02883	0.02787	1.65896	H	-4.85965	-0.98166	1.75758	H	-4.76807	-1.42952	-0.43984	H	-3.08893	-0.72252	1.16925	H	-4.59809	-0.26252	1.55258	H	4.90554	1.13478	-0.31814	H	-3.98087	1.03504	-0.66933	H	4.85853	-0.97179	-1.76096	H	4.8784	1.42585	0.23303	H	-4.86619	-0.98086	1.75299
H	-4.2176	2.04054	1.12849	H	-5.67998	1.26194	1.54273	H	-4.71173	-0.88939	2.00481	H	-3.41998	1.01223	-0.5767	H	-3.78443	1.99926	0.90894	H	4.6179	1.1414	2.16684	H	-5.81131	-0.51856	-1.23228	H	5.67586	1.27246	-1.54226	H	4.91043	0.76707	2.63234	H	-5.68353	1.26448	1.54358
H	-5.49346	2.40901	-0.95421	H	-4.74721	2.95692	0.0003	H	-6.93244	-0.77367	0.91844	H	-4.67143	1.37803	1.51826	H	-6.16698	1.896	1.57184	H	6.93776	0.79779	1.3665	H	-6.44808	1.39962	0.19403	H	4.74401	2.96215	0.00651	H	7.12317	0.79633	1.53193	H	-4.74393	2.9639	0.01029
H	-6.77051	1.33918	0.89216	H	-6.53612	1.50982	-0.94747	H	-7.75072	1.27113	-0.19038	H	-6.89942	0.40764	1.92686	H	-7.96688	1.36796	-0.02708	H	7.82587	-1.44414	0.84321	H	-6.30421	1.32058	2.65728	H	6.5372	1.51516	0.94658	H	8.02986	-1.14289	0.31427	H	-6.53132	1.52248	-0.94857
H	-6.8397	-1.10786	1.17281	H	-6.01403	-0.6233	-2.06565	H	-6.40778	-0.19825	-1.66272	H	-5.0163	-1.07489	2.55045	H	-6.9213	-0.61492	1.02594	H	6.68154	-0.33953	-1.0524	H	-4.22848	2.0559	1.52978	H	6.02056	-0.62146	2.06063	H	6.60647	0.34976	-1.06173	H	-6.00836	-0.60733	-2.07253
H	-3.1342	1.74403	-0.23507	H	-3.94514	1.40381	1.86107	H	-4.37849	0.80488	1.61598	H	-4.75465	0.07074	-1.26789	H	-4.1943	1.67763	-0.78186	H	4.29793	-0.59679	2.13155	H	-5.46553	-1.50932	0.19376	H	3.94012	1.41255	-1.85637	H	4.65308	-0.92291	2.18382	H	-3.94955	1.40316	1.86802
H	-5.01411	0.83281	-1.57817	H	-3.50568	1.83605	-0.5451	H	-6.81696	0.5376	2.08515	H	-5.70644	1.86077	0.18257	H	-6.0263	3.02393	0.22951	H	6.67972	-0.21426	2.7813	H	-7.35973	-0.00406	0.73523	H	3.50538	1.83805	0.55185	H	7.08027	-0.57834	2.62714	H	-3.50182	1.84365	-0.53513
H	-7.30154	0.62488	-0.635	H	-5.34663	1.82788	-2.21562	H	-6.30724	2.16777	0.29456	H	-6.94816	-0.28452	0.30053	H	-6.81781	1.30126	-1.36924	H	6.31925	-2.21051	1.35584	H	-5.77429	-0.36476	2.61556	H	5.35017	1.82839	2.21823	H	6.63163	-2.13136	0.74755	H	-5.33726	1.84351	-2.21166
H	-5.84916	-1.33855	-0.28426	H	-4.27221	-0.35474	-1.83869	H	-6.02729	1.49121	-2.05956	H	-6.31797	-2.07695	1.87059	H	-7.30598	-1.0114	-0.66338	H	6.30489	-2.07491	-1.10635	H	-3.7787	1.05178	2.925	H	4.27787	-0.35471	1.83826	H	6.31355	-1.32793	-1.56521	H	-4.26693	-0.34189	-1.83903

## Sheet: Compound 3
Table S3 Calculated energies and cartesian coordinates for the optimized conformers for 3
Compound 3
conformer 1				conformer 2				conformer 3				conformer 4				conformer 5				conformer 6				conformer 7				conformer 8				conformer 9				conformer 10				conformer 11				conformer 12				conformer 13
Energy (Hartree)				Energy (Hartree)				Energy (Hartree)				Energy (Hartree)				Energy (Hartree)				Energy (Hartree)				Energy (Hartree)				Energy (Hartree)				Energy (Hartree)				Energy (Hartree)				Energy (Hartree)				Energy (Hartree)				Energy (Hartree)
-2172.72				-2172.72				-2172.72				-2172.72				-2172.72				-2172.72				-2172.72				-2172.72				-2172.72				-2172.72				-2172.72				-2172.72				-2172.72
atom	X axis (Å)	Y axis (Å)	Z axis (Å)	atom	X axis (Å)	Y axis (Å)	Z axis (Å)	atom	X axis (Å)	Y axis (Å)	Z axis (Å)	atom	X axis (Å)	Y axis (Å)	Z axis (Å)	atom	X axis (Å)	Y axis (Å)	Z axis (Å)	atom	X axis (Å)	Y axis (Å)	Z axis (Å)	atom	X axis (Å)	Y axis (Å)	Z axis (Å)	atom	X axis (Å)	Y axis (Å)	Z axis (Å)	atom	X axis (Å)	Y axis (Å)	Z axis (Å)	atom	X axis (Å)	Y axis (Å)	Z axis (Å)	atom	X axis (Å)	Y axis (Å)	Z axis (Å)	atom	X axis (Å)	Y axis (Å)	Z axis (Å)	atom	X axis (Å)
C	-3.55834	-0.20785	0.14597	C	-3.7411	-0.0634	0.06708	C	3.48626	-0.58798	0.61439	C	-3.55979	-0.19697	0.13915	C	0.46494	3.38563	0.62223	C	-0.93025	2.97541	0.72773	C	0.41458	2.91203	0.77433	C	0.8744	3.34439	0.63032	C	-3.7405	-0.05836	0.06082	C	-0.06787	2.69234	1.10821	C	-3.73519	-0.04259	0.07042	C	2.68088	-2.05196	-0.65219	C	0.83689
C	-3.82294	0.18793	-1.17505	C	-3.48804	-0.19672	-1.3076	C	3.13456	0.22752	-0.473	C	-3.82821	0.2039	-1.18182	C	-0.27803	3.02852	-0.51421	C	-1.18409	2.63109	-0.61025	C	-0.08619	2.6754	-0.5171	C	0.04581	3.06416	-0.46781	C	-3.4778	-0.20175	-1.31321	C	-0.3223	2.87162	-0.26182	C	-4.7834	-0.78258	0.64507	C	3.12322	-3.11898	-1.45216	C	0.05018
C	-4.68167	-0.55389	-1.9776	C	-4.25496	-1.05349	-2.08855	C	3.44743	1.57896	-0.47161	C	-4.68823	-0.53332	-1.98349	C	-1.6412	3.2818	-0.57764	C	-2.47978	2.39707	-1.04853	C	-1.43444	2.83836	-0.79798	C	-1.28236	3.46505	-0.47178	C	-4.24394	-1.05582	-2.09403	C	-1.6116	3.08538	-0.72462	C	-5.56443	-1.62903	-0.12776	C	2.55718	-4.3799	-1.33016	C	-1.28218
C	-5.29415	-1.70685	-1.46446	C	-5.29626	-1.78811	-1.5023	C	4.09277	2.1517	0.63929	C	-5.30047	-1.68836	-1.47323	C	-2.29847	3.87668	0.51242	C	-3.55153	2.48256	-0.1442	C	-2.32089	3.22265	0.22224	C	-1.81954	4.13387	0.64228	C	-5.29645	-1.7788	-1.51206	C	-2.68449	3.11031	0.18027	C	-5.3042	-1.75233	-1.50158	C	1.51959	-4.58936	-0.40802	C	-1.86549
C	-5.03975	-2.1108	-0.14444	C	-5.56179	-1.65978	-0.12996	C	4.52122	1.32713	1.69381	C	-5.04357	-2.09715	-0.15575	C	-1.5487	4.31377	1.61898	C	-3.31665	2.89714	1.1775	C	-1.81779	3.54901	1.49335	C	-0.97748	4.4884	1.71085	C	-5.57181	-1.64121	-0.14316	C	-2.4369	2.99906	1.55805	C	-4.26155	-1.01981	-2.08807	C	1.05807	-3.53108	0.38764	C	-1.06339
C	-4.17921	-1.36543	0.64712	C	-4.78757	-0.80593	0.6416	C	4.21289	-0.0263	1.67855	C	-4.17935	-1.3539	0.63752	C	-0.18437	4.06136	1.67086	C	-2.01624	3.13143	1.60587	C	-0.46575	3.38148	1.76442	C	0.35218	4.08952	1.70205	C	-4.79522	-0.78843	0.63106	C	-1.1393	2.78445	2.01151	C	-3.48772	-0.1705	-1.30579	C	1.6427	-2.27521	0.26662	C	0.27029
O	-6.14344	-2.47356	-2.19632	O	-6.08276	-2.63957	-2.21039	O	4.30085	3.48524	0.73056	O	-6.13299	-2.36909	-2.30285	O	-3.64471	4.02376	0.54071	O	-4.81877	2.15215	-0.50438	O	-3.65962	3.27999	0.02129	O	-3.13618	4.43501	0.7258	O	-6.01398	-2.59633	-2.32555	O	-3.97009	3.22406	-0.25141	O	-6.09705	-2.59688	-2.21081	O	0.99639	-5.84317	-0.3355	O	-3.1911
C	-2.65483	0.55146	1.03815	C	-2.94714	0.83404	0.93788	C	3.00825	-1.9819	0.73137	C	-2.65403	0.55819	1.03267	C	1.8719	2.96209	0.80356	C	0.44968	3.04521	1.25864	C	1.80045	2.54422	1.14133	C	2.23391	2.77408	0.74834	C	-2.9473	0.8381	0.93342	C	1.27776	2.29385	1.59021	C	-2.93355	0.84655	0.94267	C	3.30158	-0.71858	-0.83455	C	2.19327
O	-2.1838	1.67642	0.4723	O	-2.11141	1.62312	0.23649	O	2.20637	-2.33219	-0.30378	O	-2.18024	1.68278	0.46852	O	2.3167	2.21764	-0.2374	O	1.37157	2.88307	0.28071	O	2.49123	2.08834	0.07105	O	2.54331	1.97747	-0.30308	O	-2.107	1.62368	0.23372	O	2.16205	2.26078	0.57071	O	-2.09634	1.63475	0.24197	O	2.95256	0.14127	0.14904	O	2.53728
C	-1.35972	2.57221	1.27121	C	-1.32317	2.62214	0.94344	C	1.4321	-3.55058	-0.17307	C	-1.35469	2.57579	1.26911	C	3.57456	1.51189	-0.09143	C	2.73029	2.53798	0.64664	C	3.70653	1.32648	0.27106	C	3.70587	1.119	-0.18484	C	-1.31911	2.62231	0.94178	C	3.43782	1.58589	0.69272	C	-1.30127	2.62718	0.95039	C	3.35032	1.53174	0.03003	C	3.71306
O	-2.36724	0.20993	2.18156	O	-3.03696	0.86467	2.16017	O	3.25398	-2.72696	1.6683	O	-2.36694	0.21414	2.17549	O	2.55224	3.20464	1.78927	O	0.74245	3.1853	2.43649	O	2.26883	2.59359	2.26901	O	2.9834	2.94848	1.69782	O	-3.04166	0.87121	2.15535	O	1.56111	1.99993	2.74103	O	-3.01869	0.87191	2.1654	O	4.04306	-0.41963	-1.75851	O	2.91117
C	-1.40655	3.93632	0.572	C	-1.28285	3.86713	0.04852	C	1.08578	-4.03816	-1.58637	C	-1.39696	3.94051	0.57079	C	4.10616	1.23324	-1.50423	C	3.59655	2.81493	-0.58854	C	4.38642	1.25487	-1.10272	C	4.15253	0.74845	-1.60553	C	-1.27702	3.86751	0.04723	C	4.17262	1.90697	-0.61602	C	-1.25459	3.87373	0.05798	C	3.57693	2.06901	1.45005	C	4.24319
C	-0.65806	3.83569	-0.75921	C	-0.45352	3.55142	-1.19655	C	0.06506	-3.09305	-2.22599	C	-0.64688	3.83873	-0.75944	C	3.20529	0.20911	-2.20091	C	3.19265	1.85181	-1.70911	C	3.4907	0.45671	-2.05634	C	3.12078	-0.18495	-2.24579	C	-0.44607	3.55191	-1.19679	C	3.35838	1.32645	-1.77844	C	-0.43043	3.55469	-1.18965	C	2.23914	2.14251	2.19108	C	3.27184
O	0.69882	3.38798	-0.57695	O	0.8747	3.12067	-0.85049	O	-1.12064	-2.97439	-1.41598	O	0.70867	3.38771	-0.57538	O	3.09285	-1.00838	-1.43596	O	3.27304	0.47306	-1.29548	O	3.18546	-0.85481	-1.54564	O	2.90517	-1.36381	-1.44575	O	0.88142	3.12017	-0.84905	O	3.09349	-0.08068	-1.62816	O	0.89581	3.11423	-0.84775	O	1.27526	2.9334	1.46925	O	3.04731
C	0.84769	2.13758	0.04987	C	0.95686	1.97014	-0.03758	C	-0.88149	-2.4504	-0.11985	C	0.85356	2.13654	0.05074	C	2.56793	-0.83238	-0.13371	C	2.51277	0.13341	-0.156	C	2.59184	-0.89681	-0.26036	C	2.42726	-1.09567	-0.13799	C	0.96148	1.96911	-0.03678	C	2.55434	-0.52834	-0.39906	C	0.97323	1.96332	-0.03539	C	0.98574	2.45594	0.16595	C	2.49158
C	0.08554	2.07165	1.3802	C	0.08837	2.09346	1.22226	C	0.16549	-3.26217	0.64318	C	0.0891	2.07135	1.37977	C	3.35126	0.20086	0.6763	C	2.80137	1.05379	1.03176	C	3.37408	-0.08575	0.77411	C	3.3383	-0.1327	0.62218	C	0.09171	2.09264	1.22214	C	3.25917	0.06762	0.82188	C	0.10759	2.08979	1.2262	C	2.24539	2.31697	-0.68757	C	3.33673
O	0.47294	1.06799	-0.82564	O	0.66243	0.78206	-0.77543	O	-0.55368	-1.0716	-0.15361	O	0.47777	1.06848	-0.82621	O	1.18931	-0.49981	-0.14635	O	1.11395	0.09655	-0.40798	O	1.23232	-0.4744	-0.2671	O	1.08785	-0.63409	-0.143	O	0.66644	0.78191	-0.7758	O	1.15354	-0.2942	-0.26921	O	0.67105	0.77688	-0.77313	O	0.26953	1.22923	0.19502	O	1.14809
C	1.57889	0.1661	-1.06103	C	1.82486	-0.07456	-0.92489	C	-1.75929	-0.28651	-0.30798	C	1.58205	0.16428	-1.06055	C	0.38018	-1.67952	-0.30307	C	0.66516	-1.18164	-0.937	C	0.37512	-1.56296	-0.67357	C	0.18252	-1.74989	-0.28871	C	1.82786	-0.07613	-0.92435	C	0.38387	-1.3613	-0.86439	C	1.82812	-0.08613	-0.9244	C	-1.12997	1.49806	0.43454	C	0.24855
C	2.8348	1.02858	-0.92518	C	3.03769	0.8492	-0.75741	C	-2.82976	-1.03774	0.52101	C	2.83971	1.02378	-0.9219	C	1.14866	-2.80606	0.41783	C	1.82815	-2.17541	-0.74706	C	1.00015	-2.80407	0.00251	C	0.85248	-2.93572	0.45874	C	3.0417	0.84593	-0.75481	C	1.22246	-2.63805	-0.61142	C	3.04707	0.82983	-0.75853	C	-1.41827	2.74116	-0.43631	C	0.92824
C	2.38121	1.96206	0.21144	C	2.46934	1.84758	0.26672	C	-2.27173	-2.46624	0.54424	C	2.38637	1.95726	0.21478	C	2.58701	-2.25815	0.45668	C	2.83534	-1.35302	0.08528	C	2.48831	-2.41537	0.0103	C	2.32434	-2.49121	0.51103	C	2.47343	1.84442	0.26925	C	2.64712	-2.06284	-0.55782	C	2.48564	1.83291	0.26551	C	-0.06286	3.46376	-0.35467	C	2.3692
O	3.06976	2.48978	1.05931	O	3.07347	2.44781	1.13109	O	-2.86376	-3.43353	0.96473	O	3.07468	2.48257	1.06435	O	3.55192	-2.8723	0.84339	O	3.70716	-1.79574	0.80437	O	3.403	-3.19968	0.10482	O	3.24102	-3.1334	0.96461	O	3.0773	2.44329	1.13476	O	3.65178	-2.71187	-0.72984	O	3.0949	2.43182	1.12712	O	0.10324	4.64302	-0.56203	O	3.25258
C	4.16073	0.28914	-0.71614	C	4.3727	0.19699	-0.37716	C	-2.97872	-0.46914	1.94154	C	4.16364	0.28116	-0.71136	C	0.6106	-3.09379	1.82557	C	1.43522	-3.50913	-0.09259	C	0.5469	-3.04716	1.46765	C	0.29225	-3.10363	1.88057	C	4.3754	0.19167	-0.37344	C	0.95196	-3.36003	0.73457	C	4.37794	0.17001	-0.3763	C	-1.7374	2.42323	-1.92239	C	0.23649
C	4.07053	-0.83671	0.31486	C	4.23644	-0.83387	0.74208	C	-3.40568	1.01041	1.8955	C	4.06917	-0.84547	0.31841	C	-0.86897	-3.51126	1.76495	C	0.66707	-3.34635	1.23035	C	-0.9563	-2.84099	1.64476	C	-1.21667	-3.39586	1.84467	C	4.23643	-0.84004	0.74472	C	-0.53674	-3.42061	1.06326	C	4.23451	-0.84915	0.75248	C	-2.69539	1.23754	-2.06864	C	-1.23406
C	2.88454	-1.79561	0.03291	C	3.15466	-1.88846	0.38943	C	-2.79146	1.80933	0.69803	C	2.88145	-1.80137	0.03373	C	-1.75068	-2.66421	0.78971	C	-0.20841	-2.05829	1.25398	C	-1.32755	-1.41703	1.22279	C	-2.02183	-2.51711	0.82853	C	3.15373	-1.89289	0.38967	C	-1.08303	-1.97941	1.12155	C	3.14489	-1.90363	0.42522	C	-2.0845	0.00155	-1.3947	C	-2.02076
C	1.57368	-0.97495	-0.01358	C	1.801	-1.18534	0.15408	C	-1.4946	1.14041	0.19707	C	1.57253	-0.97765	-0.01408	C	-1.00157	-1.38844	0.29778	C	-0.61104	-1.54461	-0.14319	C	-1.06817	-1.18567	-0.28472	C	-1.17839	-1.32565	0.28982	C	1.8013	-1.18756	0.15391	C	-1.04205	-1.30559	-0.2641	C	1.79679	-1.19726	0.15514	C	-1.90583	0.21341	0.12357	C	-1.09432
S	0.04179	-1.97451	-0.27878	S	0.43913	-2.38325	-0.22166	S	-0.59879	2.13557	-1.08578	S	0.03878	-1.97348	-0.28258	S	-1.94711	-0.39478	-0.93511	S	-1.69673	-2.7455	-1.05529	S	-2.29681	-2.09735	-1.35468	S	-2.0712	-0.33406	-0.99508	S	0.43769	-2.38298	-0.22338	S	-2.27539	-2.0537	-1.44537	S	0.43595	-2.39314	-0.23105	S	-3.55377	0.19982	0.98399	S	-1.9088
C	0.16452	-3.23075	1.06039	C	0.058	-3.01911	1.46963	C	0.41657	3.23705	-0.00614	C	0.15702	-3.23166	1.05512	C	-3.27535	0.30141	0.13715	C	-2.6571	-1.61793	-2.13459	C	-2.94596	-0.73341	-2.40509	C	-3.25854	0.61804	0.04976	C	0.05346	-3.01793	1.4676	C	-2.72356	-0.59198	-2.46158	C	0.04335	-3.03544	1.45525	C	-3.06554	-0.48716	2.62371	C	-3.14278
C	0.50976	-2.69226	2.45186	C	-0.57128	-1.93379	2.33105	C	1.05481	4.37337	-0.80652	C	0.50122	-2.69595	2.44794	C	-4.46554	0.72469	-0.71829	C	-3.75424	-0.73999	-1.52471	C	-4.00419	0.19093	-1.79365	C	-4.30347	1.31865	-0.81875	C	-0.57626	-1.93178	2.32764	C	-3.64108	0.48202	-1.86389	C	-0.57713	-1.94871	2.32133	C	-2.53171	-1.91226	2.52964	C	-4.31744
O	1.52935	-3.07798	3.02796	O	0.12462	-1.05881	2.85756	O	2.25798	4.65472	-0.70873	O	1.5183	-3.08587	3.02565	O	-4.77144	1.91427	-0.88886	O	-4.29901	0.10122	-2.26315	O	-3.97076	1.4076	-2.03004	O	-4.46738	2.54674	-0.7978	O	0.11977	-1.05799	2.85594	O	-3.76128	1.56183	-2.47011	O	0.12629	-1.08173	2.85113	O	-1.32534	-2.13044	2.38704	O	-4.48263
N	-0.35734	-1.81254	3.00034	N	-1.91725	-1.9842	2.47023	N	0.22626	5.07756	-1.59792	N	-0.36414	-1.81411	2.99578	N	-5.16005	-0.29151	-1.26217	N	-4.0944	-0.92118	-0.24247	N	-4.98226	-0.39121	-1.07969	N	-5.05147	0.51246	-1.59315	N	-1.92263	-1.9802	2.46375	N	-4.30499	0.19708	-0.73508	N	-1.92326	-1.9888	2.46099	N	-3.45505	-2.8976	2.60853	N	-5.16221
C	-2.82654	4.48141	0.39072	C	-2.67235	4.40391	-0.30733	C	2.31929	-4.2316	-2.47396	C	-2.81522	4.4896	0.38799	C	4.27598	2.50292	-2.3444	C	3.5385	4.27436	-1.05083	C	4.73606	2.63119	-1.67746	C	4.43753	1.97069	-2.48403	C	-2.66585	4.40486	-0.31041	C	4.44058	3.4023	-0.81343	C	-2.6413	4.42046	-0.29365	C	4.61781	1.2668	2.23711	C	4.5416
C	3.09824	-2.60634	-1.23547	C	3.60191	-2.73118	-0.79449	C	-3.80814	2.03508	-0.41685	C	3.09511	-2.61151	-1.23505	C	-2.36322	-3.46712	-0.36589	C	-1.36396	-2.17185	2.23329	C	-2.73776	-1.04228	1.63392	C	-2.54713	-3.37006	-0.31472	C	3.60116	-2.73449	-0.79499	C	-2.39568	-1.86992	1.87422	C	3.61452	-2.86636	-0.65737	C	-2.77171	-1.32694	-1.66693	C	-2.94359
O	3.14723	-2.15218	-2.36355	O	3.45299	-2.43931	-1.96659	O	-3.70166	1.69705	-1.57774	O	3.14835	-2.15632	-2.36252	O	-3.54206	-3.37507	-0.65627	O	-2.51638	-1.83089	2.03956	O	-3.54694	-1.78156	2.15599	O	-1.85475	-4.06694	-1.04486	O	3.45217	-2.44177	-1.96685	O	-3.38879	-1.24815	1.54421	O	4.14927	-3.93197	-0.43445	O	-2.40369	-2.38662	-1.19932	O	-4.13371
O	3.24198	-3.91901	-0.97202	O	4.24162	-3.84678	-0.39647	O	-4.88202	2.71394	0.0429	O	3.23325	-3.92501	-0.97271	O	-1.56871	-4.28058	-1.07844	O	-0.95484	-2.6754	3.40921	O	-2.9925	0.25624	1.37009	O	-3.8755	-3.30216	-0.45003	O	4.24108	-3.85031	-0.39788	O	-2.33412	-2.52015	3.05119	O	3.41994	-2.39786	-1.91072	O	-3.82136	-1.2274	-2.50586	O	-2.30958
O	5.19091	1.23665	-0.43424	O	5.33445	1.21587	-0.106	O	-1.71625	-0.6642	2.58366	O	5.1955	1.22604	-0.42679	O	0.82538	-1.89607	2.57064	O	2.59441	-4.3311	0.03151	O	1.29541	-2.14595	2.29202	O	0.59708	-1.89422	2.58101	O	5.33814	1.20904	-0.10017	O	1.66907	-2.63901	1.74289	O	5.34602	1.18496	-0.11171	O	-0.48925	2.1649	-2.57608	O	0.41965
O	2.9321	1.87029	-2.07656	O	3.20439	1.59695	-1.96405	O	-4.08074	-1.01175	-0.14903	O	2.94073	1.86629	-2.07238	O	1.07739	-3.9819	-0.39093	O	2.44998	-2.43568	-2.00262	O	0.76935	-3.9574	-0.78313	O	0.80675	-4.16291	-0.24302	O	3.21078	1.59437	-1.96067	O	1.07164	-3.53945	-1.69154	O	3.21811	1.57489	-1.96593	O	-2.44844	3.52531	0.13281	O	0.9632
H	-3.35171	1.07766	-1.57652	H	-2.68093	0.36495	-1.76347	H	2.59275	-0.19546	-1.31046	H	-3.35692	1.09507	-1.58013	H	0.20877	2.5205	-1.33752	H	-0.35724	2.51393	-1.29915	H	0.58257	2.328	-1.29427	H	0.43871	2.50795	-1.31012	H	-2.66227	0.35147	-1.76452	H	0.49427	2.81924	-0.96992	H	-4.9829	-0.67681	1.70643	H	3.91914	-2.9445	-2.16887	H	0.47656
H	-4.87875	-0.24355	-3.00064	H	-4.04989	-1.15549	-3.15118	H	3.16172	2.21003	-1.30659	H	-4.89854	-0.2325	-3.00483	H	-2.21665	2.97683	-1.44594	H	-2.66825	2.10323	-2.0757	H	-1.82412	2.61819	-1.78588	H	-1.9246	3.23026	-1.31415	H	-4.04359	-1.1774	-3.15372	H	-1.80423	3.19092	-1.78704	H	-6.37833	-2.19875	0.30903	H	2.8985	-5.21126	-1.93891	H	-1.89529
H	-5.52376	-3.00412	0.23706	H	-6.37444	-2.2314	0.30668	H	5.04256	1.77458	2.5344	H	-5.52027	-2.99068	0.23937	H	-2.06146	4.79511	2.44603	H	-4.15549	2.98058	1.8616	H	-2.5076	3.87302	2.26662	H	-1.3961	5.02697	2.55543	H	-6.39064	-2.19801	0.30544	H	-3.27197	3.03735	2.2507	H	-4.06083	-1.11761	-3.15193	H	0.23761	-3.67481	1.08661	H	-1.51702
H	-3.97921	-1.66924	1.6692	H	-4.99112	-0.69629	1.70179	H	4.49339	-0.65994	2.51387	H	-3.97808	-1.66229	1.65795	H	0.39019	4.34663	2.54636	H	-1.82263	3.4022	2.63901	H	-0.08128	3.57477	2.76113	H	0.99523	4.31413	2.54704	H	-5.00637	-0.67272	1.68909	H	-0.9482	2.65097	3.07176	H	-2.67955	0.38948	-1.76187	H	1.27526	-1.45771	0.87537	H	0.88062
H	-6.24036	-2.09743	-3.08725	H	-5.80725	-2.64331	-3.14242	H	3.6428	3.94433	0.15116	H	-6.49345	-3.1451	-1.84183	H	-4.05585	3.36048	-0.06901	H	-4.77776	1.56632	-1.30361	H	-3.8858	2.74568	-0.77648	H	-3.63763	3.83825	0.11572	H	-6.70975	-3.04097	-1.81297	H	-4.00677	2.903	-1.18703	H	-5.82411	-2.59841	-3.1436	H	0.29267	-5.86283	0.33434	H	-3.66588
H	-1.80023	2.62308	2.2706	H	-1.82587	2.83122	1.89003	H	2.04559	-4.28741	0.35088	H	-1.7964	2.62712	2.26796	H	4.26284	2.15137	0.4668	H	3.03305	3.15838	1.49428	H	4.33205	1.84599	1.0027	H	4.48858	1.67622	0.33575	H	-1.82287	2.83144	1.88779	H	3.96722	1.97857	1.56642	H	-1.80146	2.83714	1.89813	H	4.27239	1.57076	-0.55432	H	4.45336
H	-0.84273	4.62522	1.21523	H	-0.7411	4.6341	0.61847	H	0.58962	-5.00939	-1.45393	H	-0.83215	4.62745	1.21524	H	5.0903	0.76446	-1.36854	H	4.62843	2.57475	-0.29913	H	5.31345	0.68382	-0.95921	H	5.08137	0.17392	-1.48675	H	-0.73584	4.63409	0.61825	H	5.13288	1.37624	-0.57545	H	-0.70641	4.63594	0.62813	H	3.94107	3.09823	1.32753	H	5.17936
H	-1.17824	3.16282	-1.45163	H	-0.9437	2.78647	-1.81137	H	0.49979	-2.10007	-2.393	H	-1.16765	3.16737	-1.45287	H	2.20641	0.62403	-2.38072	H	2.17826	2.07056	-2.06277	H	2.56072	1.00039	-2.25933	H	2.16756	0.33424	-2.40309	H	-0.93583	2.78756	-1.81269	H	2.41403	1.86955	-1.89466	H	-0.92728	2.79424	-1.80468	H	1.83573	1.1385	2.36829	H	2.31407
H	-0.56711	4.81626	-1.23285	H	-0.3074	4.4446	-1.80939	H	-0.28406	-3.48447	-3.18483	H	-0.55292	4.81928	-1.23251	H	3.63093	-0.09903	-3.15902	H	3.87843	1.92847	-2.55642	H	3.99856	0.27423	-3.00692	H	3.47571	-0.55746	-3.21003	H	-0.29854	4.44533	-1.80894	H	3.91504	1.40243	-2.71627	H	-0.27958	4.44797	-1.80117	H	2.35231	2.64566	3.15471	H	3.68594
H	0.1037	1.05778	1.78462	H	0.04109	1.13656	1.7494	H	0.41371	-2.75658	1.57986	H	0.104	1.05707	1.78328	H	2.84209	0.38683	1.62523	H	2.11207	0.83764	1.8521	H	2.81109	-0.05163	1.70797	H	2.8742	0.14053	1.57325	H	0.04309	1.13565	1.74898	H	2.70036	-0.19525	1.72005	H	0.05525	1.1322	1.75164	H	1.99103	1.85278	-1.64273	H	2.81686
H	0.60921	2.72146	2.09107	H	0.58485	2.81296	1.88446	H	-0.30559	-4.21875	0.89778	H	0.61333	2.71917	2.09205	H	4.32967	-0.23866	0.90172	H	3.8147	0.83067	1.38345	H	4.31709	-0.6102	0.96737	H	4.2591	-0.68252	0.84855	H	0.58793	2.81164	1.88509	H	4.25575	-0.3822	0.89815	H	0.60931	2.80513	1.88895	H	2.61554	3.32844	-0.89181	H	4.25879
H	1.47499	-0.22072	-2.07557	H	1.8003	-0.48936	-1.93314	H	-2.0786	-0.28767	-1.3539	H	1.47892	-0.22146	-2.07559	H	0.30993	-1.94743	-1.36557	H	0.44496	-1.07249	-2.00217	H	0.43804	-1.69823	-1.75906	H	0.10195	-2.02081	-1.34864	H	1.80397	-0.49033	-1.93285	H	0.32843	-1.21208	-1.94864	H	1.79647	-0.49682	-1.93433	H	-1.27584	1.77849	1.48419	H	0.15043
H	4.42173	-0.14036	-1.68696	H	4.73549	-0.3022	-1.28072	H	-3.7513	-1.05661	2.45757	H	4.42529	-0.148	-1.68215	H	1.20324	-3.91459	2.2542	H	0.80379	-4.02789	-0.82015	H	0.81948	-4.08408	1.7039	H	0.81656	-3.95203	2.33866	H	4.7387	-0.30719	-1.27699	H	1.36337	-4.37225	0.63216	H	4.73845	-0.33704	-1.27619	H	-2.19616	3.33045	-2.33709	H	0.73922
H	5.01568	-1.38899	0.32795	H	5.20397	-1.31599	0.91355	H	-4.49513	1.07371	1.85577	H	5.01303	-1.39992	0.33248	H	-0.92494	-4.57196	1.50113	H	0.05407	-4.2385	1.38658	H	-1.50458	-3.58422	1.05336	H	-1.35943	-4.45602	1.61476	H	5.20311	-1.32354	0.91701	H	-1.0624	-4.01541	0.30661	H	5.19831	-1.3369	0.9292	H	-3.66599	1.49584	-1.62873	H	-1.25173
H	3.93332	-0.41877	1.32017	H	3.94816	-0.34496	1.68074	H	-3.09758	1.47546	2.83759	H	3.93135	-0.42812	1.32389	H	-1.27813	-3.43306	2.77687	H	1.3764	-3.30567	2.06221	H	-1.22786	-3.00984	2.69215	H	-1.61998	-3.24146	2.85028	H	3.94752	-0.35156	1.68341	H	-0.67404	-3.92235	2.02469	H	3.95343	-0.34465	1.68521	H	-2.86937	1.0493	-3.13283	H	-1.72493
H	2.81878	-2.49271	0.87064	H	3.05246	-2.5581	1.24751	H	-2.54502	2.81149	1.06601	H	2.81278	-2.49908	0.87072	H	-2.62334	-2.31689	1.34412	H	0.40835	-1.24994	1.67278	H	-0.65894	-0.72302	1.74904	H	-2.89148	-2.09953	1.33839	H	3.04987	-2.56363	1.2467	H	-0.37305	-1.41903	1.74797	H	3.02389	-2.52998	1.31278	H	-1.06946	-0.11971	-1.79679	H	-2.69269
H	1.47778	-0.51578	0.97737	H	1.52054	-0.72421	1.10629	H	-0.81718	1.0505	1.04867	H	1.47612	-0.51909	0.97711	H	-0.82941	-0.76205	1.17455	H	-1.19079	-0.62628	-0.02297	H	-1.19539	-0.12604	-0.51559	H	-0.96812	-0.66808	1.13445	H	1.52101	-0.72648	1.10619	H	-1.31126	-0.25085	-0.16233	H	1.50482	-0.73024	1.10093	H	-1.34646	-0.62822	0.5368	H	-0.84259
H	-0.82291	-3.70395	1.07088	H	-0.60575	-3.87256	1.31016	H	-0.22799	3.67862	0.76185	H	-0.83139	-3.70287	1.06357	H	-3.59789	-0.46356	0.84787	H	-1.98609	-0.95766	-2.69083	H	-2.12507	-0.11396	-2.76925	H	-3.77031	-0.06482	0.735	H	-0.61068	-3.87094	1.30745	H	-1.82351	-0.08811	-2.82392	H	-0.62892	-3.88061	1.28769	H	-2.29382	0.14179	3.0724	H	-3.50853
H	0.90913	-3.98705	0.80944	H	0.9725	-3.3756	1.9487	H	1.21078	2.67017	0.47855	H	0.90041	-3.9892	0.80427	H	-2.90131	1.16666	0.68292	H	-3.13302	-2.27041	-2.87397	H	-3.39165	-1.23651	-3.27062	H	-2.72354	1.37222	0.62604	H	0.96698	-3.37489	1.9482	H	-3.22753	-1.00299	-3.34306	H	0.95234	-3.4049	1.93485	H	-3.96895	-0.42325	3.23615	H	-2.67537
H	-1.13467	-1.38821	2.50199	H	-2.47183	-2.62206	1.91605	H	-0.74878	4.83153	-1.70257	H	-1.13874	-1.38623	2.49619	H	-4.8506	-1.25252	-1.16448	H	-3.53807	-1.47916	0.4026	H	-4.94412	-1.37002	-0.82879	H	-4.90877	-0.48831	-1.61713	H	-2.4768	-2.61733	1.90836	H	-4.02147	-0.57059	-0.12929	H	-2.48341	-2.62028	1.90512	H	-4.4462	-2.70692	2.64572	H	-4.9773
H	-0.11371	-1.41207	3.89698	H	-2.38739	-1.14962	2.8086	H	0.59471	5.84611	-2.14277	H	-0.12086	-1.41544	3.89332	H	-5.93793	-0.09233	-1.87738	H	-4.76267	-0.27396	0.15937	H	-5.71143	0.18109	-0.67474	H	-5.7665	0.91376	-2.18564	H	-2.39247	-1.14511	2.80135	H	-4.81041	0.95778	-0.29526	H	-2.38643	-1.15207	2.80369	H	-3.16477	-3.85381	2.45195	H	-5.93858
H	-2.79993	5.48546	-0.04664	H	-2.59105	5.32857	-0.8892	H	2.03452	-4.65261	-3.44448	H	-2.78523	5.49401	-0.04831	H	4.72171	2.26623	-3.31678	H	4.20959	4.4382	-1.90114	H	5.26129	2.53012	-2.63367	H	4.82475	1.66244	-3.46142	H	-2.58342	5.32966	-0.89191	H	4.99273	3.57841	-1.74327	H	-2.55517	5.34565	-0.87398	H	4.79607	1.72118	3.21796	H	4.98633
H	-3.34077	4.54854	1.35604	H	-3.2457	4.62678	0.59961	H	3.03024	-4.9204	-2.00389	H	-3.33066	4.55715	1.35263	H	4.93472	3.21668	-1.83711	H	3.84791	4.94767	-0.24364	H	5.38987	3.18126	-0.99134	H	5.1864	2.61843	-2.01448	H	-3.2404	4.62766	0.59578	H	5.04035	3.7984	0.01365	H	-3.21098	4.64544	0.61506	H	5.57291	1.23986	1.70054	H	5.24855
H	-3.42154	3.83863	-0.26537	H	-3.24126	3.67857	-0.89758	H	2.83547	-3.28281	-2.65102	H	-3.41102	3.84912	-0.26963	H	3.31467	2.99593	-2.51973	H	2.52538	4.55464	-1.35586	H	3.83697	3.23296	-1.84349	H	3.53227	2.56409	-2.64648	H	-3.23415	3.67988	-0.90169	H	3.50672	3.97149	-0.85796	H	-3.21644	3.70003	-0.88389	H	4.28854	0.23464	2.3935	H	3.63101
H	3.3812	-4.37777	-1.82429	H	4.54379	-4.31496	-1.19971	H	-5.49394	2.82996	-0.70946	H	3.37254	-4.38337	-1.82519	H	-0.62756	-4.2759	-0.77412	H	-1.72959	-2.70684	4.00432	H	-3.91037	0.44637	1.64265	H	-4.13285	-3.87527	-1.20021	H	4.54336	-4.31771	-1.20153	H	-3.18894	-2.38327	3.50411	H	3.77005	-3.06503	-2.53349	H	-4.17518	-2.12972	-2.6317	H	-2.96301
H	4.92163	1.71537	0.37247	H	4.9807	1.74555	0.63374	H	-1.8279	-0.46875	3.52793	H	4.92591	1.70464	0.37989	H	0.67419	-2.09128	3.50956	H	3.21978	-3.84857	0.60565	H	1.18366	-2.41807	3.21728	H	0.40778	-2.03631	3.52247	H	4.98409	1.73857	0.63954	H	1.69235	-3.17991	2.54901	H	4.99709	1.71958	0.62678	H	-0.64288	2.1756	-3.5348	H	0.08323
H	3.80204	2.30594	-1.99979	H	4.0446	2.08014	-1.84955	H	-4.65089	-1.6735	0.28272	H	3.81146	2.30003	-1.9938	H	1.61843	-4.68316	0.01573	H	3.0094	-3.2216	-1.84705	H	1.46479	-4.60062	-0.55228	H	-0.10607	-4.26551	-0.59317	H	4.05151	2.07633	-1.84485	H	1.86518	-4.10634	-1.69724	H	4.06234	2.05142	-1.85266	H	-2.31594	4.43669	-0.18779	H	1.52411
[truncated: 46 more columns]
